# Supplementary material for: Hierarchically porous tungsten oxidenanotubes with crystalline walls made of the metastable orthorhombic polymorph
Source: Royal Society of Chemistry journal article supplement (doi:10.1039/c2ta00169a), 2012-10-18
Supplement: c2ta00169a.pdf [file c2ta00169a.pdf]

# Hierarchically Porous Tungsten Oxide Nanotubes with Crystalline Walls Made of the Metastable Orthorhombic Polymorph†

Martin Schieder,<sup>a</sup> Thomas Lunkenbein,<sup>a</sup> Thomas Martin,<sup>a</sup> Wolfgang Milius,<sup>a</sup> Gudrun Auffermann,<sup>b</sup> and Josef Breu<sup>\*a</sup>

## Supplementary Information

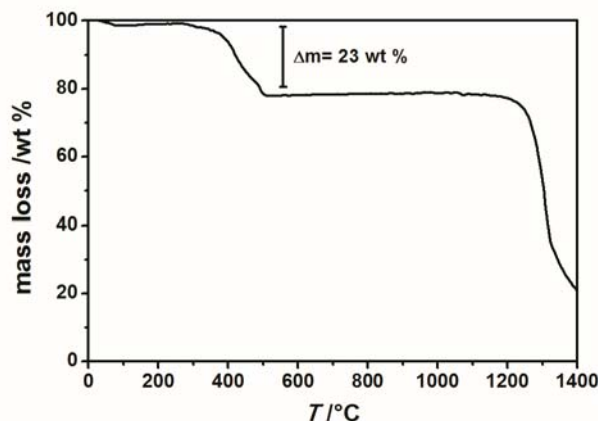

Fig. SI 1 Thermogravimetric analysis of PB-*b*-P2VP/AMT hybrid material from 25 to 1400 °C in dynamic air (heating rate 3 °C min<sup>-1</sup>).

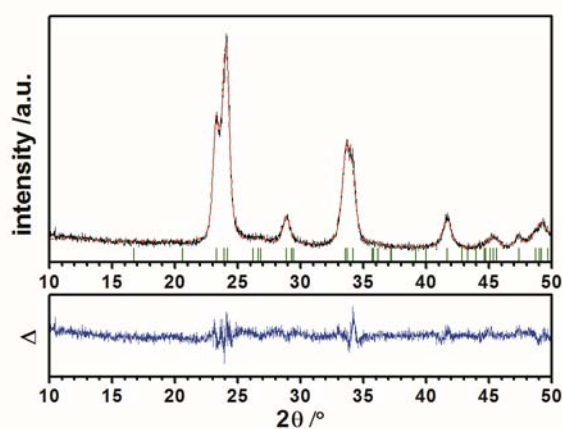

Fig. SI 2 XRD data (black), calculated Rietveld refinement (red), and difference pattern (blue) for tungsten oxide nanotubes. Tick marks (green) indicate calculated peak positions of orthorhombic WO<sub>3</sub>.

Table S1 Refinement parameters for tungsten oxide nanotubes

|                                                      |            |
|------------------------------------------------------|------------|
| Space group                                          | Pmnb       |
| R(wp)                                                | 9.025      |
| R(p)                                                 | 6.822      |
| R(bragg)                                             | 1.094      |
| Cell constants [Å]:                                  |            |
| a                                                    | 7.436 (14) |
| b                                                    | 7.506 (14) |
| c                                                    | 7.706 (12) |
| Zero point correction:                               | 0.25 (18)  |
| Isotropic temperature factors have not been refined. |            |

**Table S2** Refined atomic parameters and interatomic distances [ $\text{\AA}$ ] of orthorhombic  $\text{WO}_3$

| Atom  | x           | y            | z            |
|-------|-------------|--------------|--------------|
| W1    | 0.25        | 0.02322 (61) | 0.01858 (64) |
| W2    | 0.25        | 0.0204 (10)  | 0.53060 (83) |
| O1    | 0           | 0            | 0            |
| O2    | 0.5         | 0            | 0            |
| O3    | 0           | 0            | 0.5          |
| O4    | 0.5         | 0.5          | 0            |
| O5    | 0.25        | 0.2692 (32)  | 0.0468 (82)  |
| O6    | 0.25        | 0.2788 (38)  | 0.4541 (60)  |
| O7    | 0.25        | 0.009 (16)   | 0.2620 (23)  |
| O8    | 0.25        | 0.9591 (94)  | 0.7658 (24)  |
| W1-O1 | 1.8726 (41) | W2-O3        | 1.8801 (41)  |
| W1-O2 | 1.8726 (41) | W2-O4        | 1.8801 (41)  |
| W1-O5 | 1.859 (31)  | W2-O5        | 1.977 (38)   |
| W1-O6 | 1.846 (36)  | W2-O6        | 2.028 (35)   |
| W1-O7 | 1.879 (23)  | W2-O7        | 2.072 (21)   |
| W1-O8 | 2.007 (31)  | W2-O8        | 1.869 (26)   |

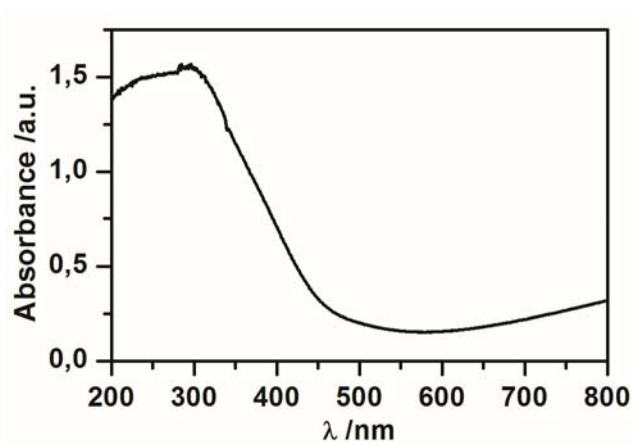

**Fig. SI 3** UV-Vis absorption spectrum of tungsten oxide nanotubes.

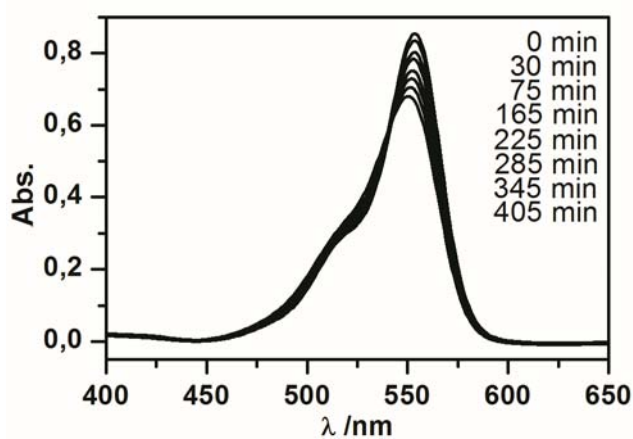

**Fig. SI 4** UV-Vis absorption spectra of RhB solution as a function of irradiation time without tungsten oxide nanotubes.

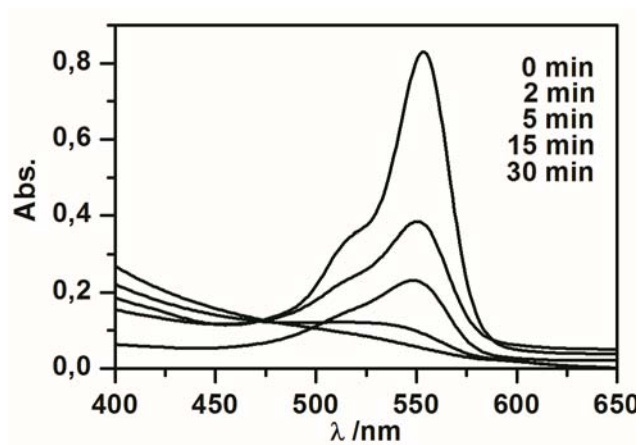

**Fig. SI 5** UV-Vis absorption spectra of RhB solution as a function of irradiation time with commercial  $\text{TiO}_2$  (P25, Evonik) photocatalyst.
